# Supplementary material for: A novel and practical asymmetric synthesis of dapoxetine hydrochloride
Source: publisher site journal article supplement (doi:10.3762/bjoc.11.283), 2015-12-17
Supplement: Additional file 1 [file 1860-5397-11-283-S1.pdf]

## Supporting Information

for

### **A novel and practical asymmetric synthesis of dapoxetine hydrochloride**

Yijun Zhu<sup>1,2</sup>, Zhenren Liu<sup>1</sup>, Hongyan Li<sup>1</sup>, Deyong Ye<sup>2,\*</sup> and Weicheng Zhou<sup>1,\*</sup>

Address: <sup>1</sup>State Key Lab of New Drug & Pharmaceutical Process, Shanghai Key Lab of Anti-Infectives, State Institute of Pharmaceutical Industry, No.285, Gebaini Rd, Shanghai 201203, China and <sup>2</sup>School of Pharmacy, Fudan University, No.826, Zhangheng Rd., Shanghai 201203, China

Email: Deyong Ye - dyye@shmu.edu.cn;

Weicheng Zhou - zhouweicheng58@163.com

\* Corresponding author

**<sup>1</sup>H NMR, <sup>13</sup>C NMR and ESIMS spectra of compounds 1, 4, 5, 5", 6 and 7 and chiral HPLC diagrams of 1 and 7**

## Table of contents

|                                                                       |     |
|-----------------------------------------------------------------------|-----|
| $^1\text{H}$ NMR and $^{13}\text{C}$ NMR spectra of compound <b>4</b> | S3  |
| HRMS of <b>4</b> and $^1\text{H}$ NMR spectrum of <b>5</b>            | S4  |
| $^{13}\text{C}$ NMR and HRMS spectra of <b>5</b>                      | S5  |
| $^1\text{H}$ NMR and ESIMS spectra of compound <b>5</b>               | S6  |
| $^1\text{H}$ NMR and $^{13}\text{C}$ NMR spectra of compound <b>6</b> | S7  |
| ESIMS of <b>6</b> and $^1\text{H}$ NMR spectrum of <b>7</b>           | S8  |
| $^{13}\text{C}$ NMR and ESIMS spectra of <b>7</b>                     | S9  |
| $^1\text{H}$ NMR and $^{13}\text{C}$ NMR spectra of compound <b>1</b> | S10 |
| ESI-MS spectra of compound <b>1</b>                                   | S11 |
| Chiral HPLC of <b>7</b>                                               | S12 |
| Chiral HPLC of <b>1</b>                                               | S13 |

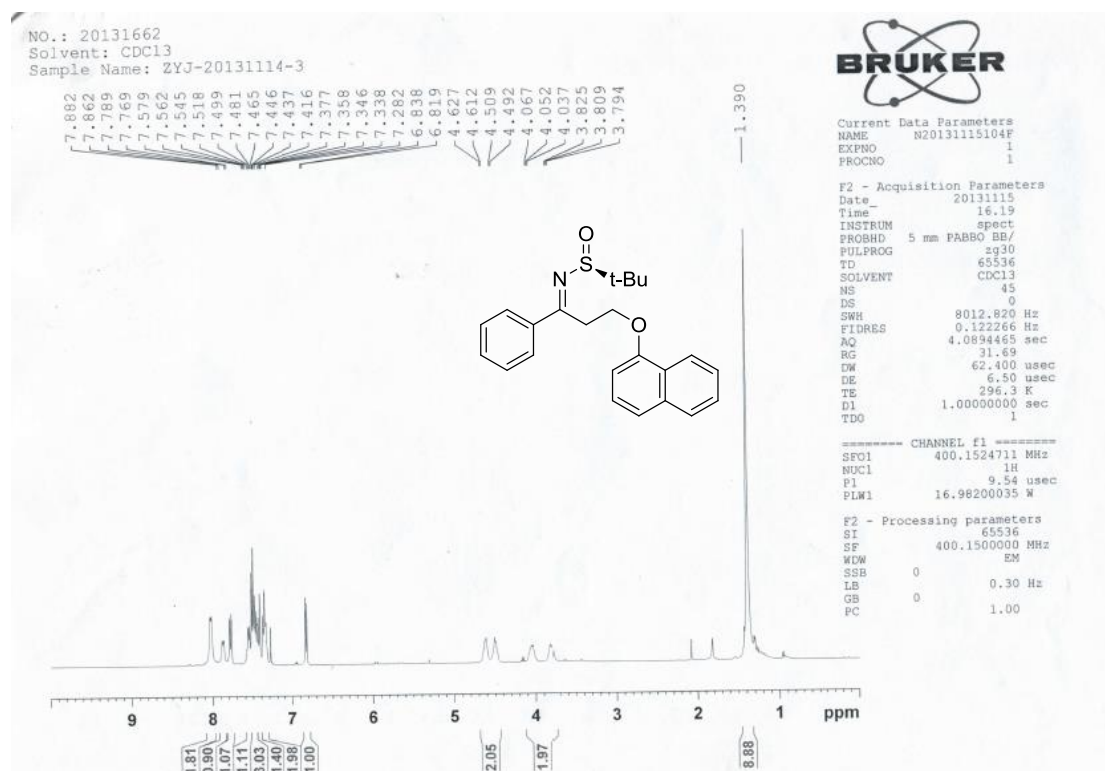

<sup>1</sup>H NMR spectrum of compound 4

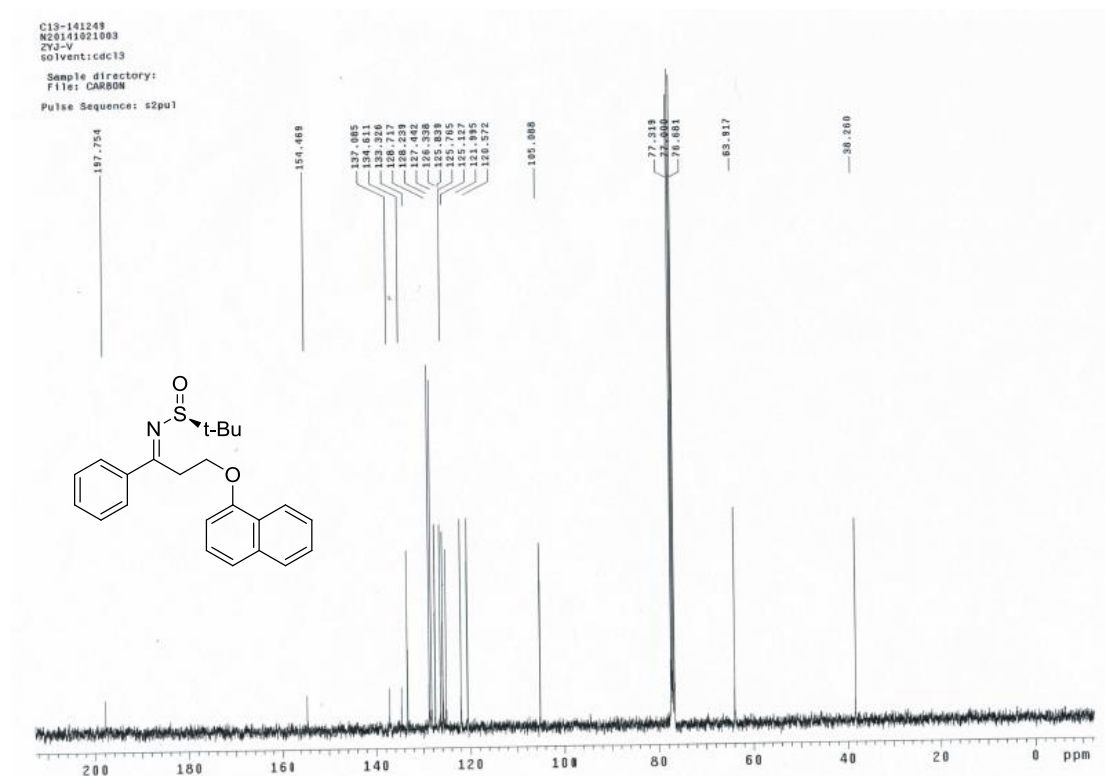

<sup>13</sup>C NMR spectrum of compound 4

## Elemental Composition Report

### Single Mass Analysis

Tolerance = 30.0 PPM / DBE: min = -1.5, max = 50.0  
Element prediction: Off  
Number of isotope peaks used for i-FIT = 3

Monoisotopic Mass, Even Electron Ions

15 formula(e) evaluated with 1 results within limits (up to 50 best isotopic matches for each mass)

Elements Used:

C: 10-40 H: 10-40 N: 0-1 O: 0-2 Na: 1-1 S: 1-1

SIPI

Q-ToF micro

14:10:51,13-Nov-2015

ZYJ-V

YA019

TOF MS ES+  
3.42e+003

Q15-1893HR 22 (0.407) AM (Cen.2, 80.00, Ar,5000.0,360.29,1.00); Sm (Mn, 2x3.00); Sb (1,40.00); Cm (9.22)

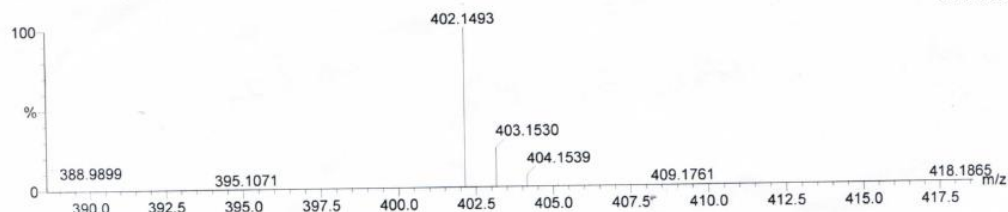

Minimum: -1.5  
Maximum: 5.0 30.0 50.0

| Mass     | Calc. Mass | mDa  | PPM  | DBE  | i-FIT | Formula           |
|----------|------------|------|------|------|-------|-------------------|
| 402.1493 | 402.1504   | -1.1 | -2.7 | 11.5 | 9.4   | C23 H25 N O2 Na S |

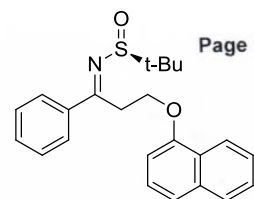

HRMS spectrum of compound 4

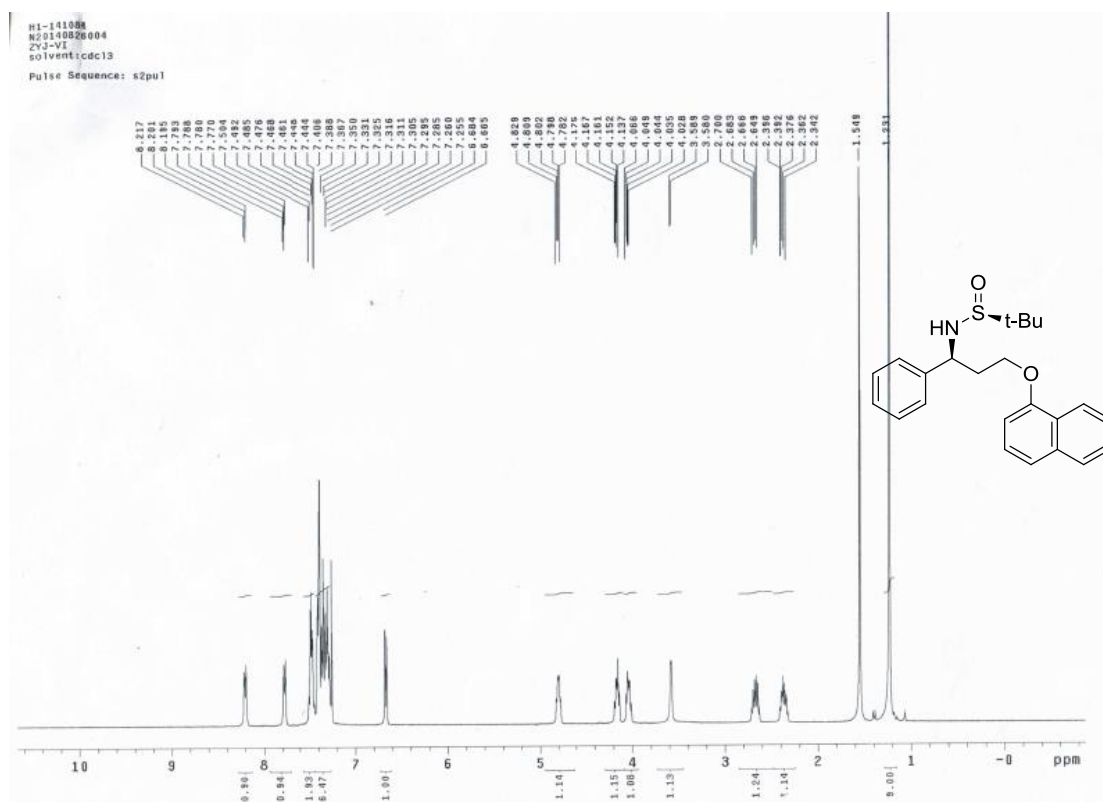

<sup>1</sup>H NMR spectrum of compound 5



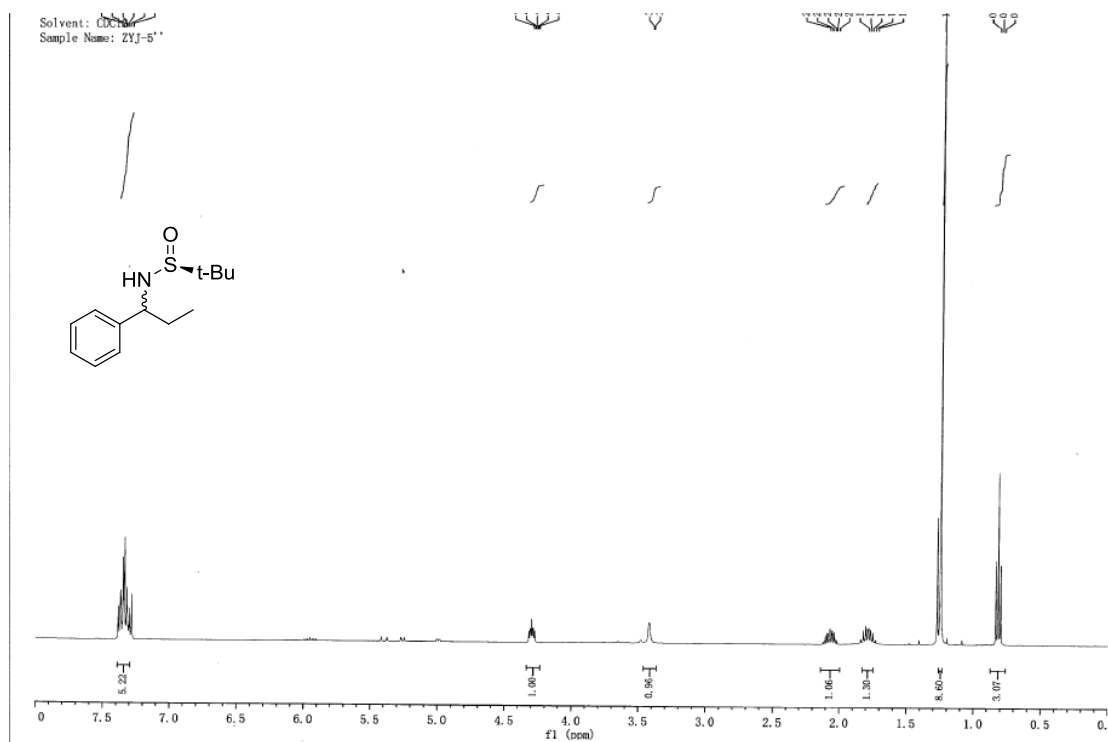

<sup>1</sup>H NMR spectrum of compound 5

| Sample Name   | Position       | Vial 70    | Instrument Name | Instrument 1  | User Name              |
|---------------|----------------|------------|-----------------|---------------|------------------------|
| Inj Vol       | InjPosition    |            | SampleType      | Sample        | IRM Calibration Status |
| Data Filename | 20140616-010.d | ACQ Method | Comment         | N20140616012F | Acquired Time          |
|               |                |            |                 |               | Success                |
|               |                |            |                 |               | 6/16/2014 3:45:43 PM   |

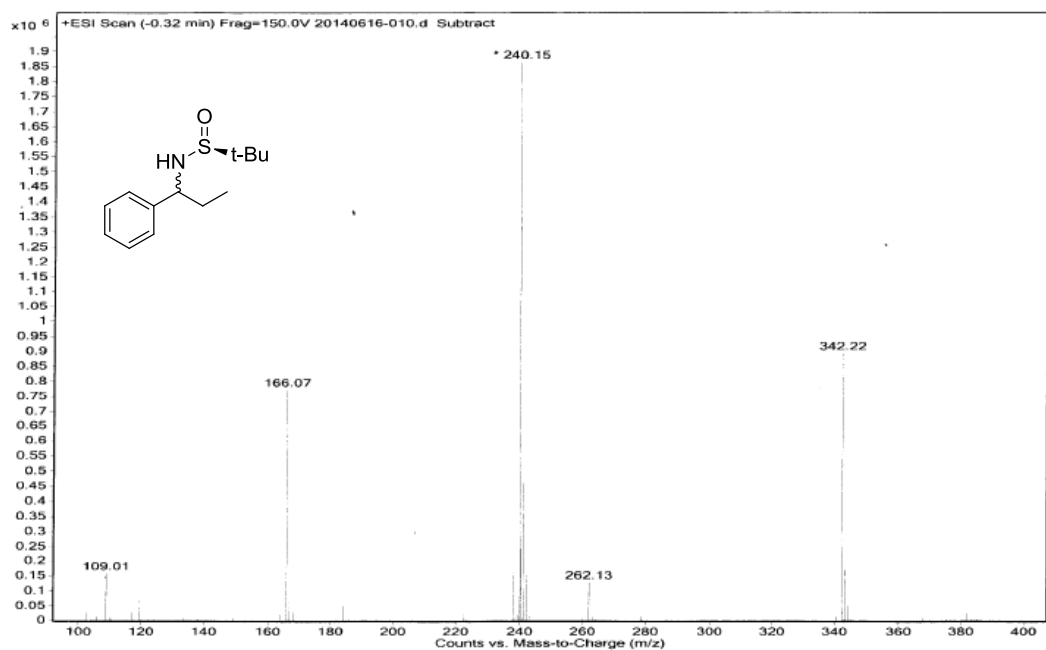

ESIMS spectrum of compound 5

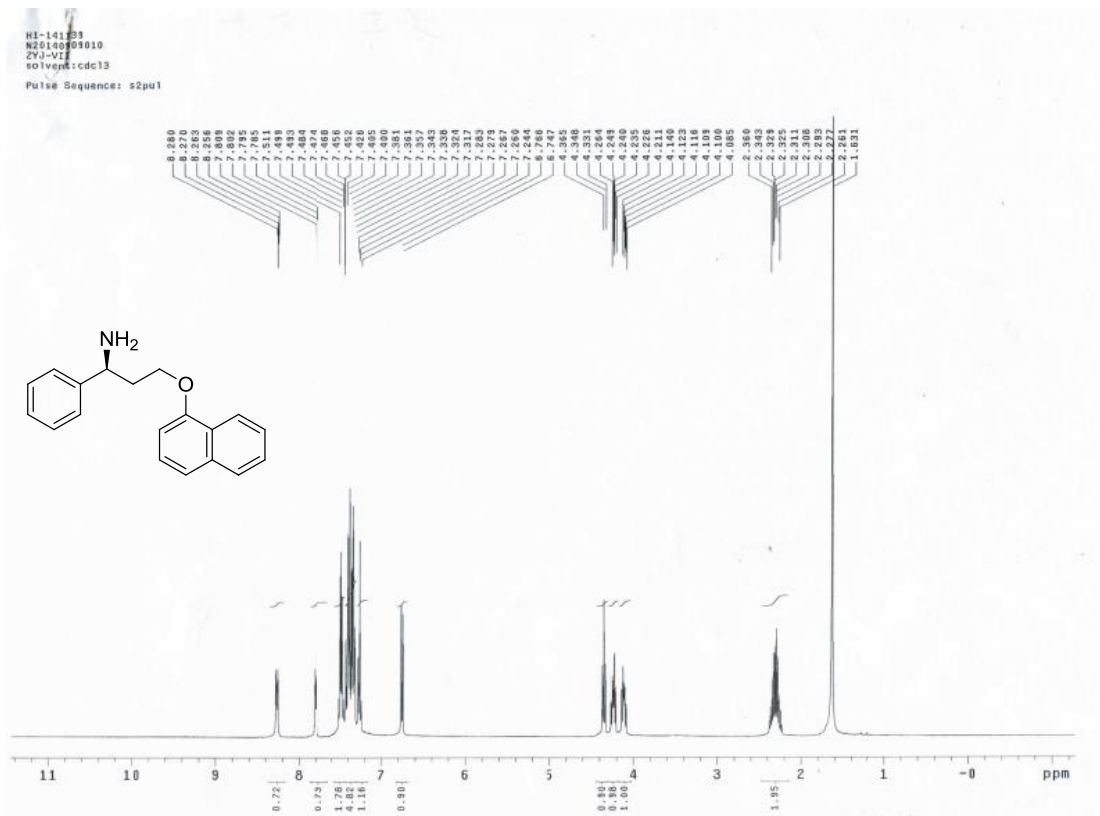

$^1\text{H}$  NMR spectrum of compound 6

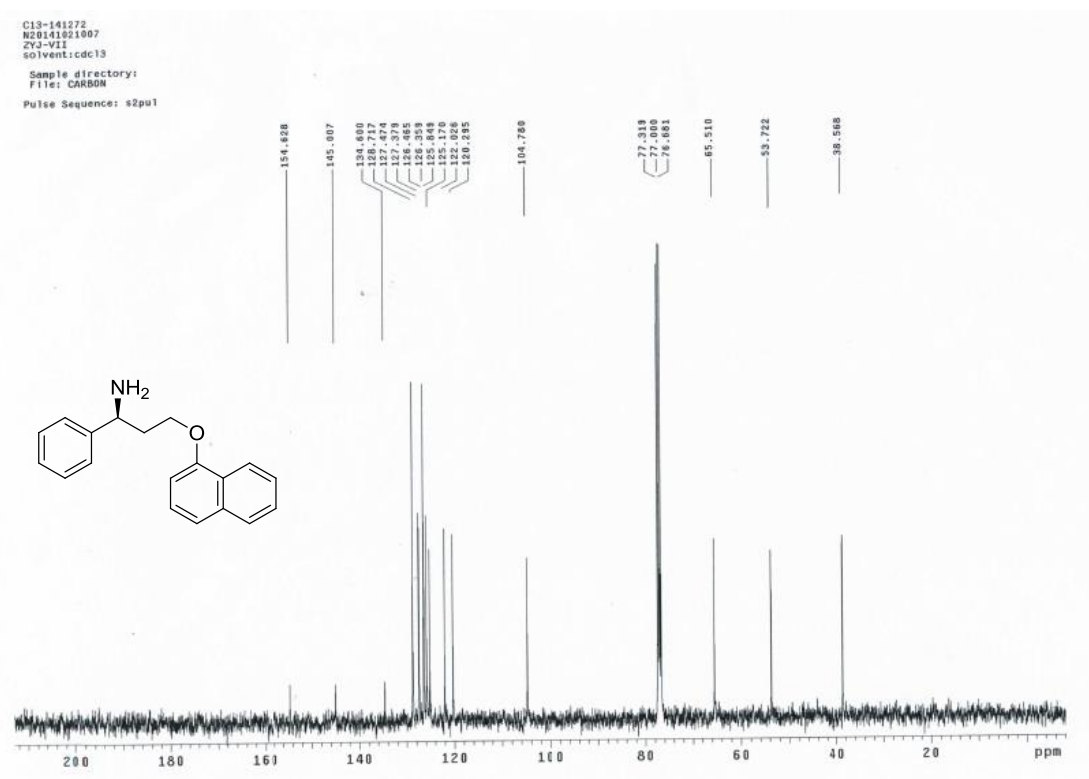

$^{13}\text{C}$  NMR spectrum of compound 6

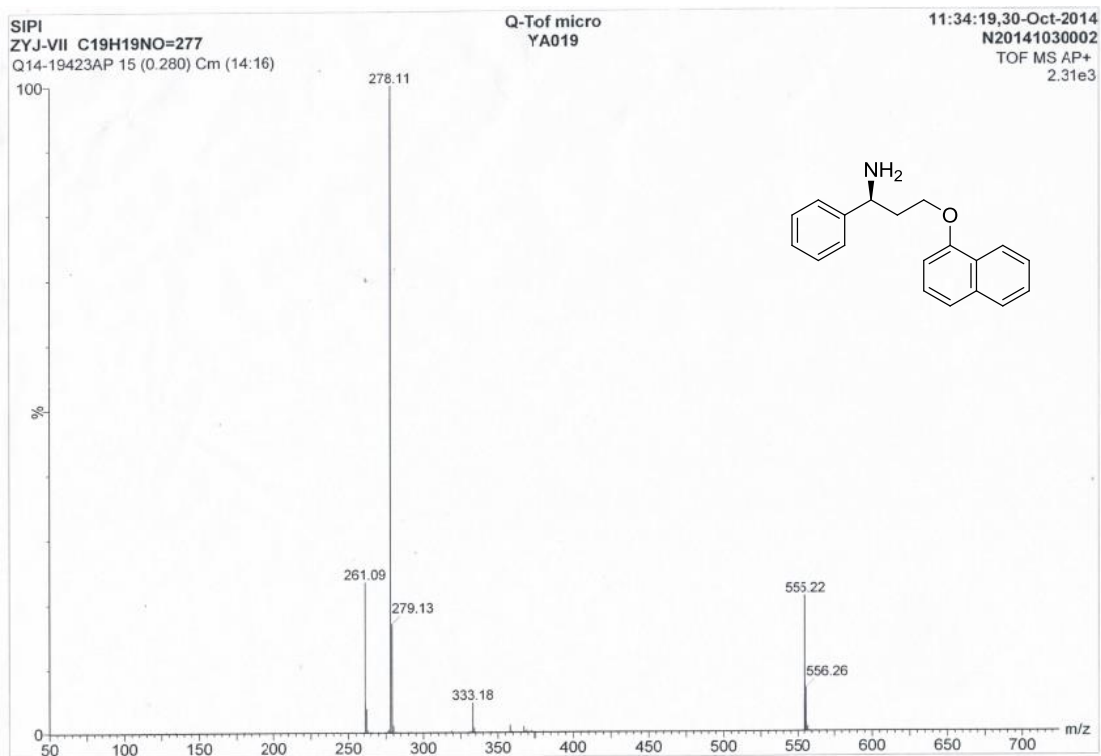

ESIMS spectrum of compound 6

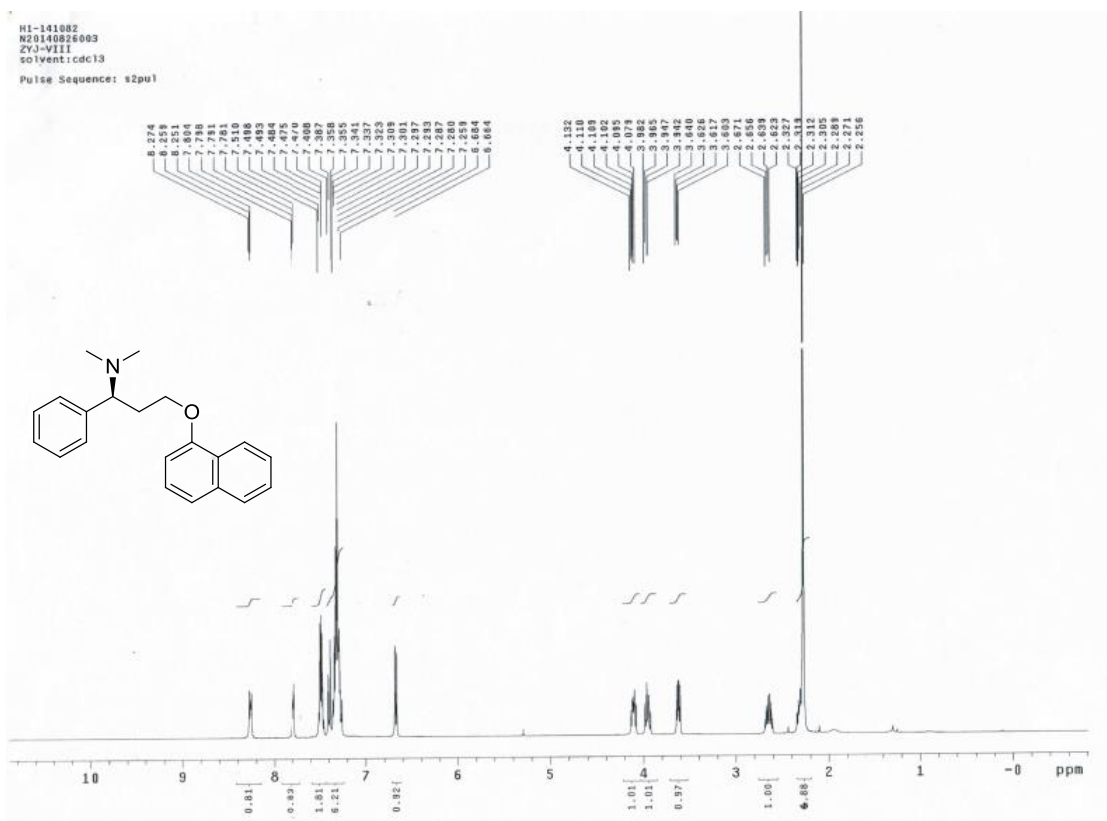

<sup>1</sup>H NMR spectrum of compound 7



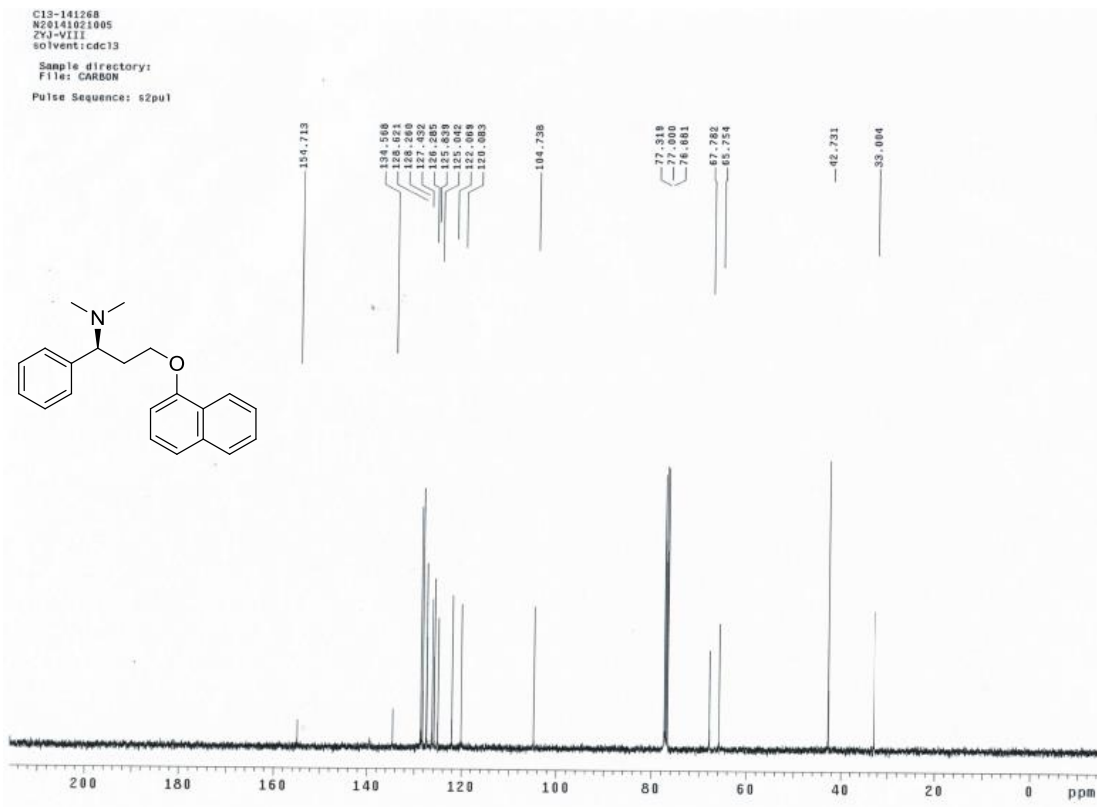

$^{13}\text{C}$  NMR spectrum of compound 7

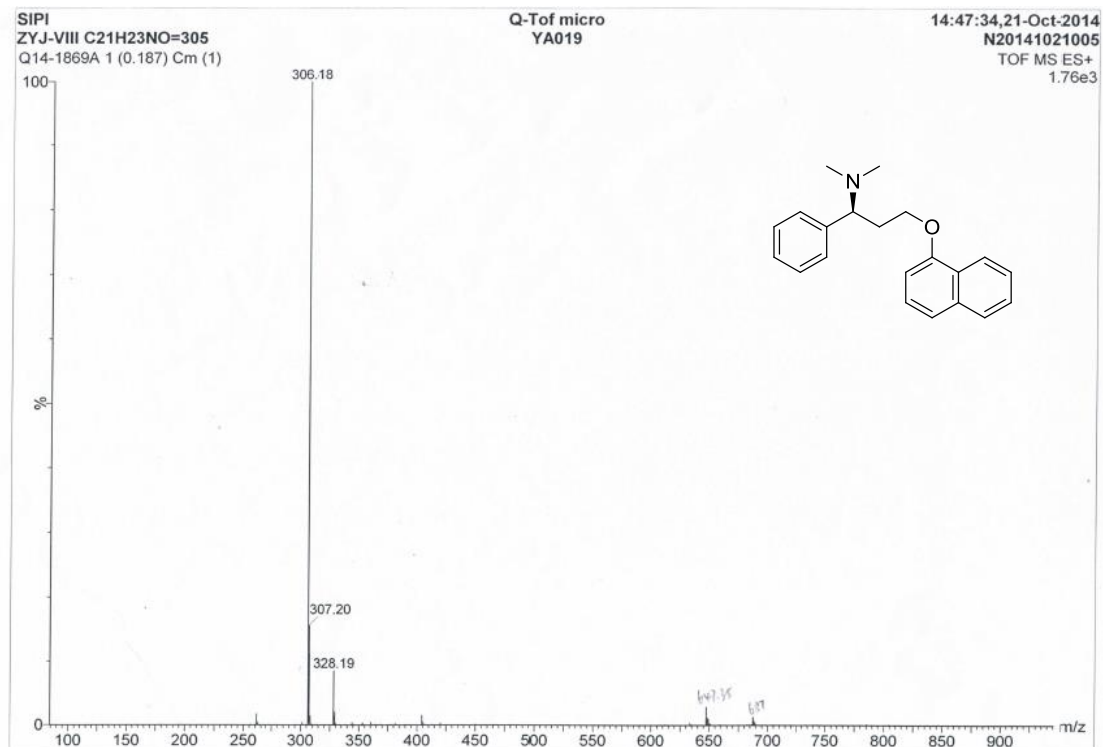

ESIMS spectrum of compound 7

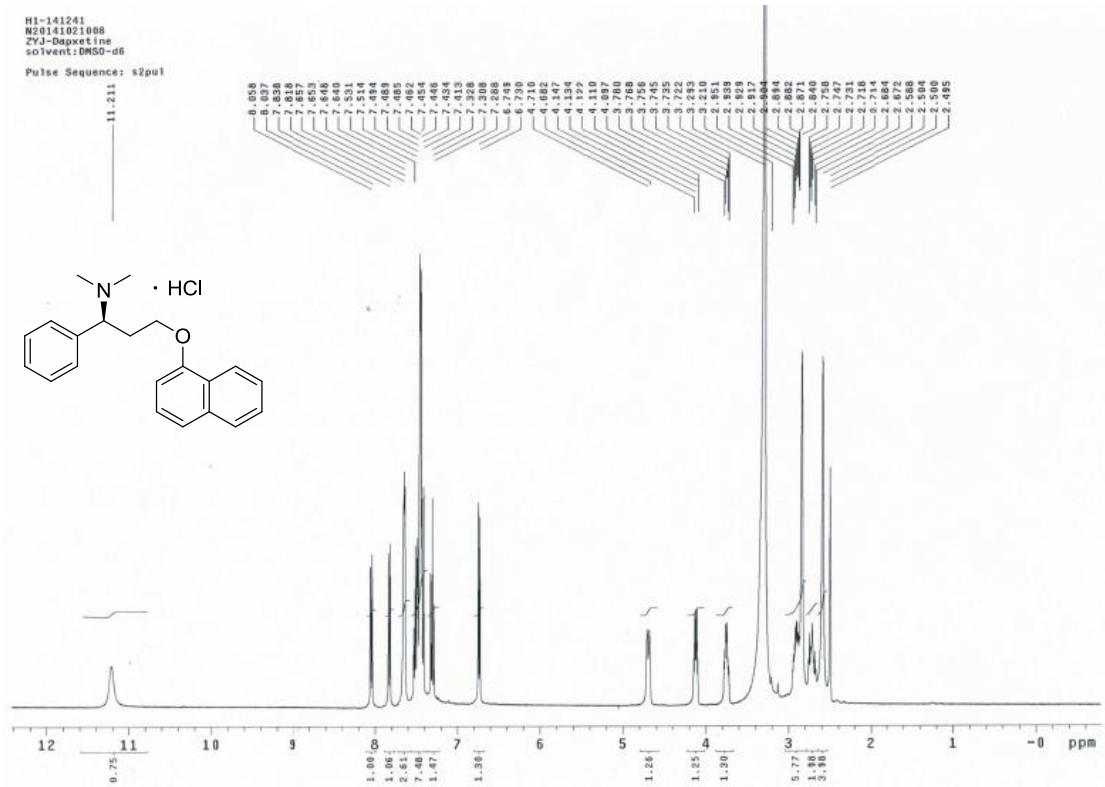

<sup>1</sup>H NMR spectrum of compound 1

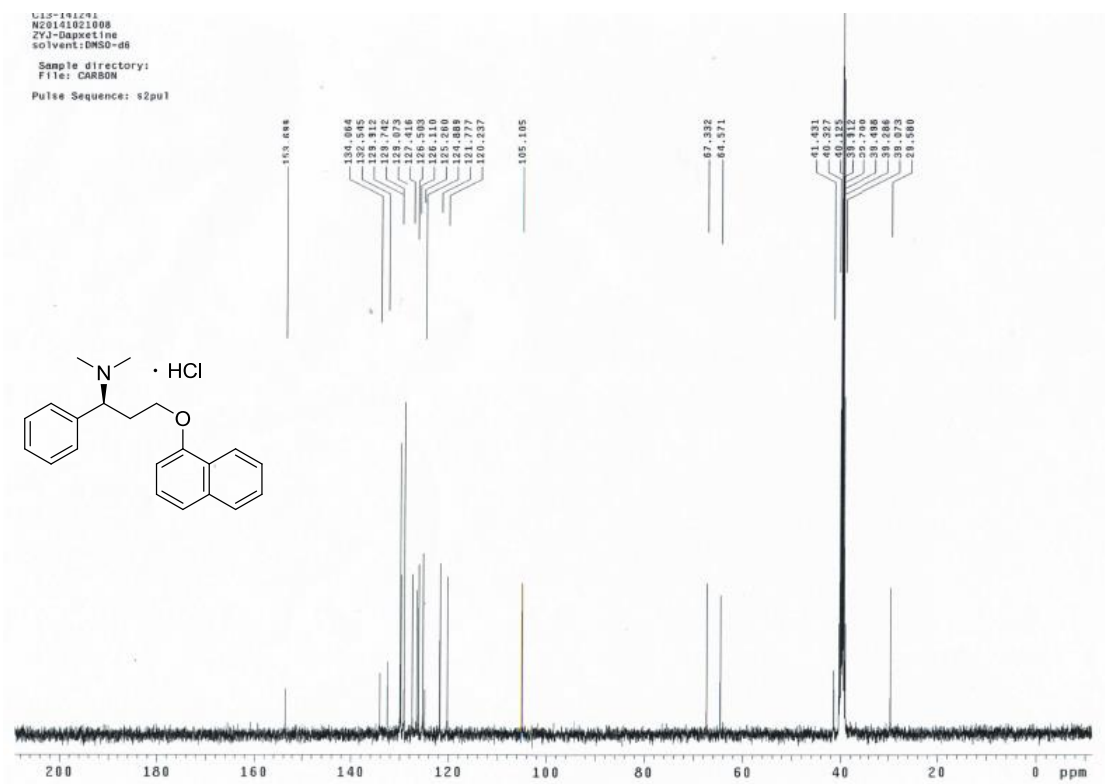

<sup>13</sup>C NMR spectrum of compound 1

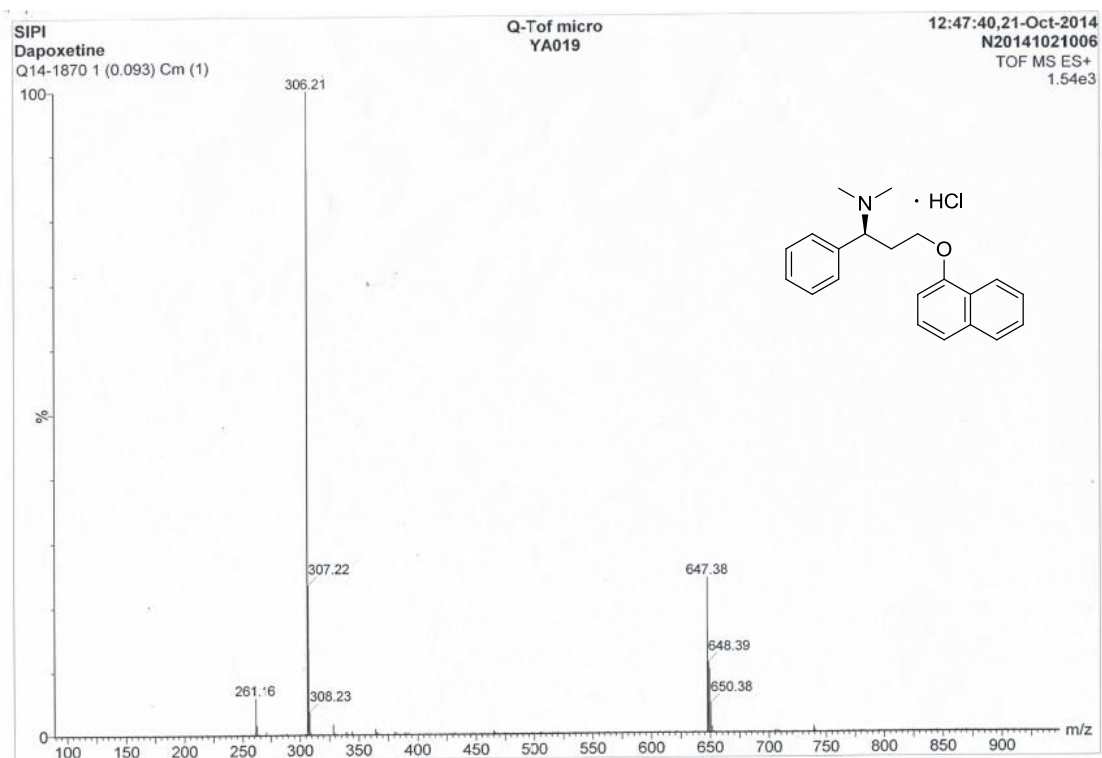

ESIMS spectrum of compound **1**

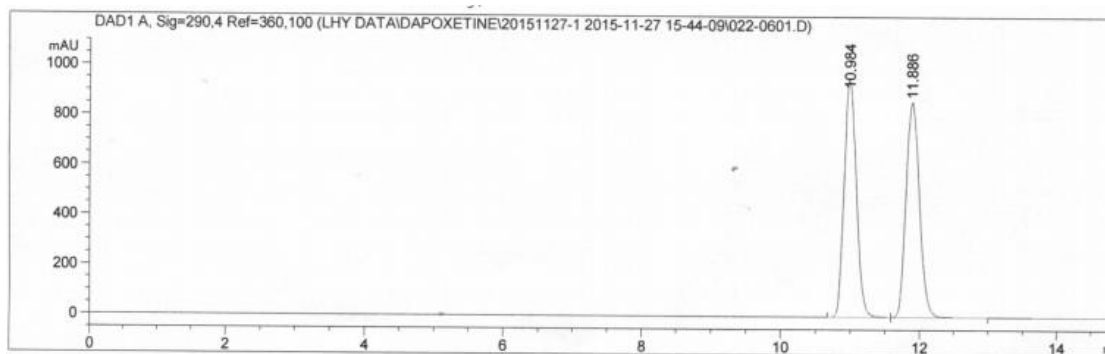

=====  
 Area Percent Report  
 =====

Sorted By : Signal  
 Multiplier : 1.0000  
 Dilution : 1.0000  
 Use Multiplier & Dilution Factor with ISTDs

Signal 1: DAD1 A, Sig=290,4 Ref=360,100

| Peak # | RetTime [min] | Type | Width [min] | Area [mAU*s] | Height [mAU] | Area %  |
|--------|---------------|------|-------------|--------------|--------------|---------|
| 1      | 10.984        | BB   | 0.1886      | 1.14817e4    | 952.94586    | 49.9049 |
| 2      | 11.886        | BB   | 0.2081      | 1.15254e4    | 861.45459    | 50.0951 |

**Chiral HPLC of Racemic-7**

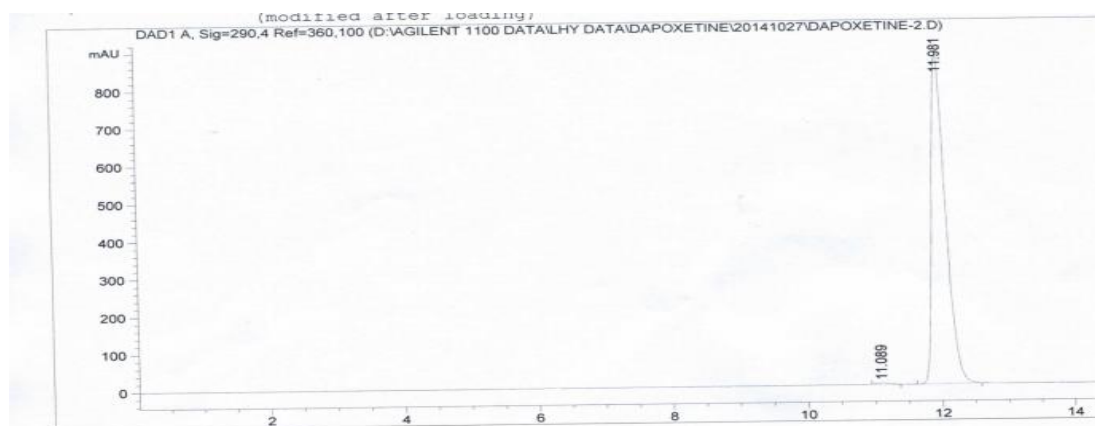

=====  
 Area Percent Report  
 =====

Sorted By : Signal  
 Multiplier : 1.0000  
 Dilution : 1.0000  
 Use Multiplier & Dilution Factor with ISTDs

Signal 1: DAD1 A, Sig=290,4 Ref=360,100

| Peak # | RetTime [min] | Type | Width [min] | Area [mAU*s] | Height [mAU] | Area %  |
|--------|---------------|------|-------------|--------------|--------------|---------|
| 1      | 11.089        | BB   | 0.1448      | 47.24658     | 4.21311      | 0.3667  |
| 2      | 11.981        | BB   | 0.2249      | 1.28360e4    | 876.36298    | 99.6333 |

**Chiral HPLC of 7**

Last changed : 10/27/2014 12:48:24 PM by LHY  
 Analysis Method : D:\AGILENT 1100 DATA\METHODS\P\_TADALAFIL\_对映体和非对映体.M  
 Last changed : 12/3/2014 8:54:22 AM by lxr  
 (modified after loading)

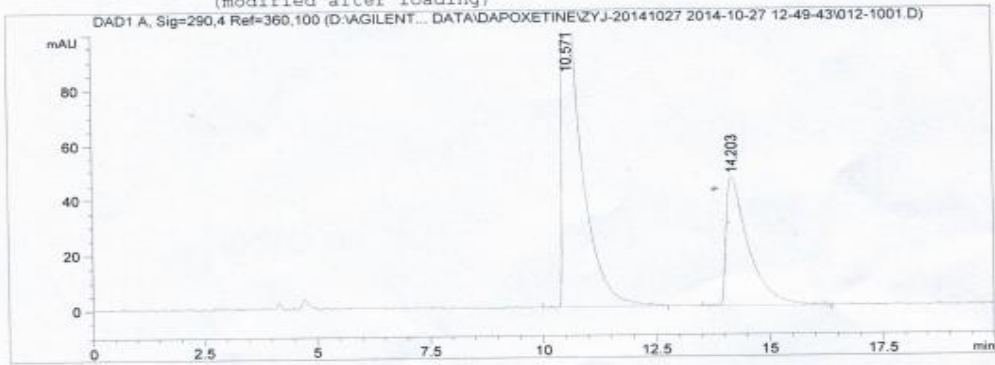

Area Percent Report

Sorted By : Signal  
 Multiplier : 1.0000  
 Dilution : 1.0000  
 Use Multiplier & Dilution Factor with ISTDs

Signal 1: DAD1 A, Sig=290,4 Ref=360,100

| Peak # | RetTime [min] | Type | Width [min] | Area [mAU*s] | Height [mAU] | Area %  |
|--------|---------------|------|-------------|--------------|--------------|---------|
| 1      | 10.571        | BB   | 0.3648      | 3743.35107   | 145.16963    | 70.0842 |
| 2      | 14.203        | BB   | 0.4891      | 1597.87012   | 46.47349     | 29.9158 |

Mixed Sample of (R)-1 and (S)-1

Last changed : 10/27/2014 12:48:24 PM by LHY  
 Analysis Method : D:\AGILENT 1100 DATA\LHY DATA\DAPOXETINE\ZYJ-20141027 2014-10-27 12-49-43  
 \005-0801.D\DA.M (DAPOXETINE\_TEST\_8.M, From Data File)  
 Last changed : 12/3/2014 8:49:13 AM by lxr  
 (modified after loading)

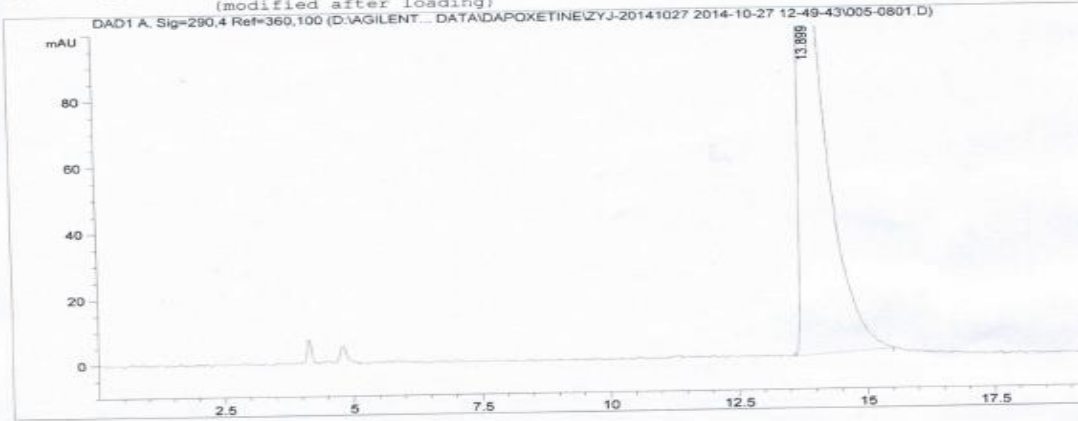

Area Percent Report

Sorted By : Signal  
 Multiplier : 1.0000  
 Dilution : 1.0000  
 Use Multiplier & Dilution Factor with ISTDs

Signal 1: DAD1 A, Sig=290,4 Ref=360,100

| Peak # | RetTime [min] | Type | Width [min] | Area [mAU*s] | Height [mAU] | Area %   |
|--------|---------------|------|-------------|--------------|--------------|----------|
| 1      | 13.899        | BB   | 0.4288      | 5424.02246   | 177.34618    | 100.0000 |

Chiral HPLC of 1
